# Supplementary material
Source: PubMed Central journal article supplement (PMC8886214)

Figure S1

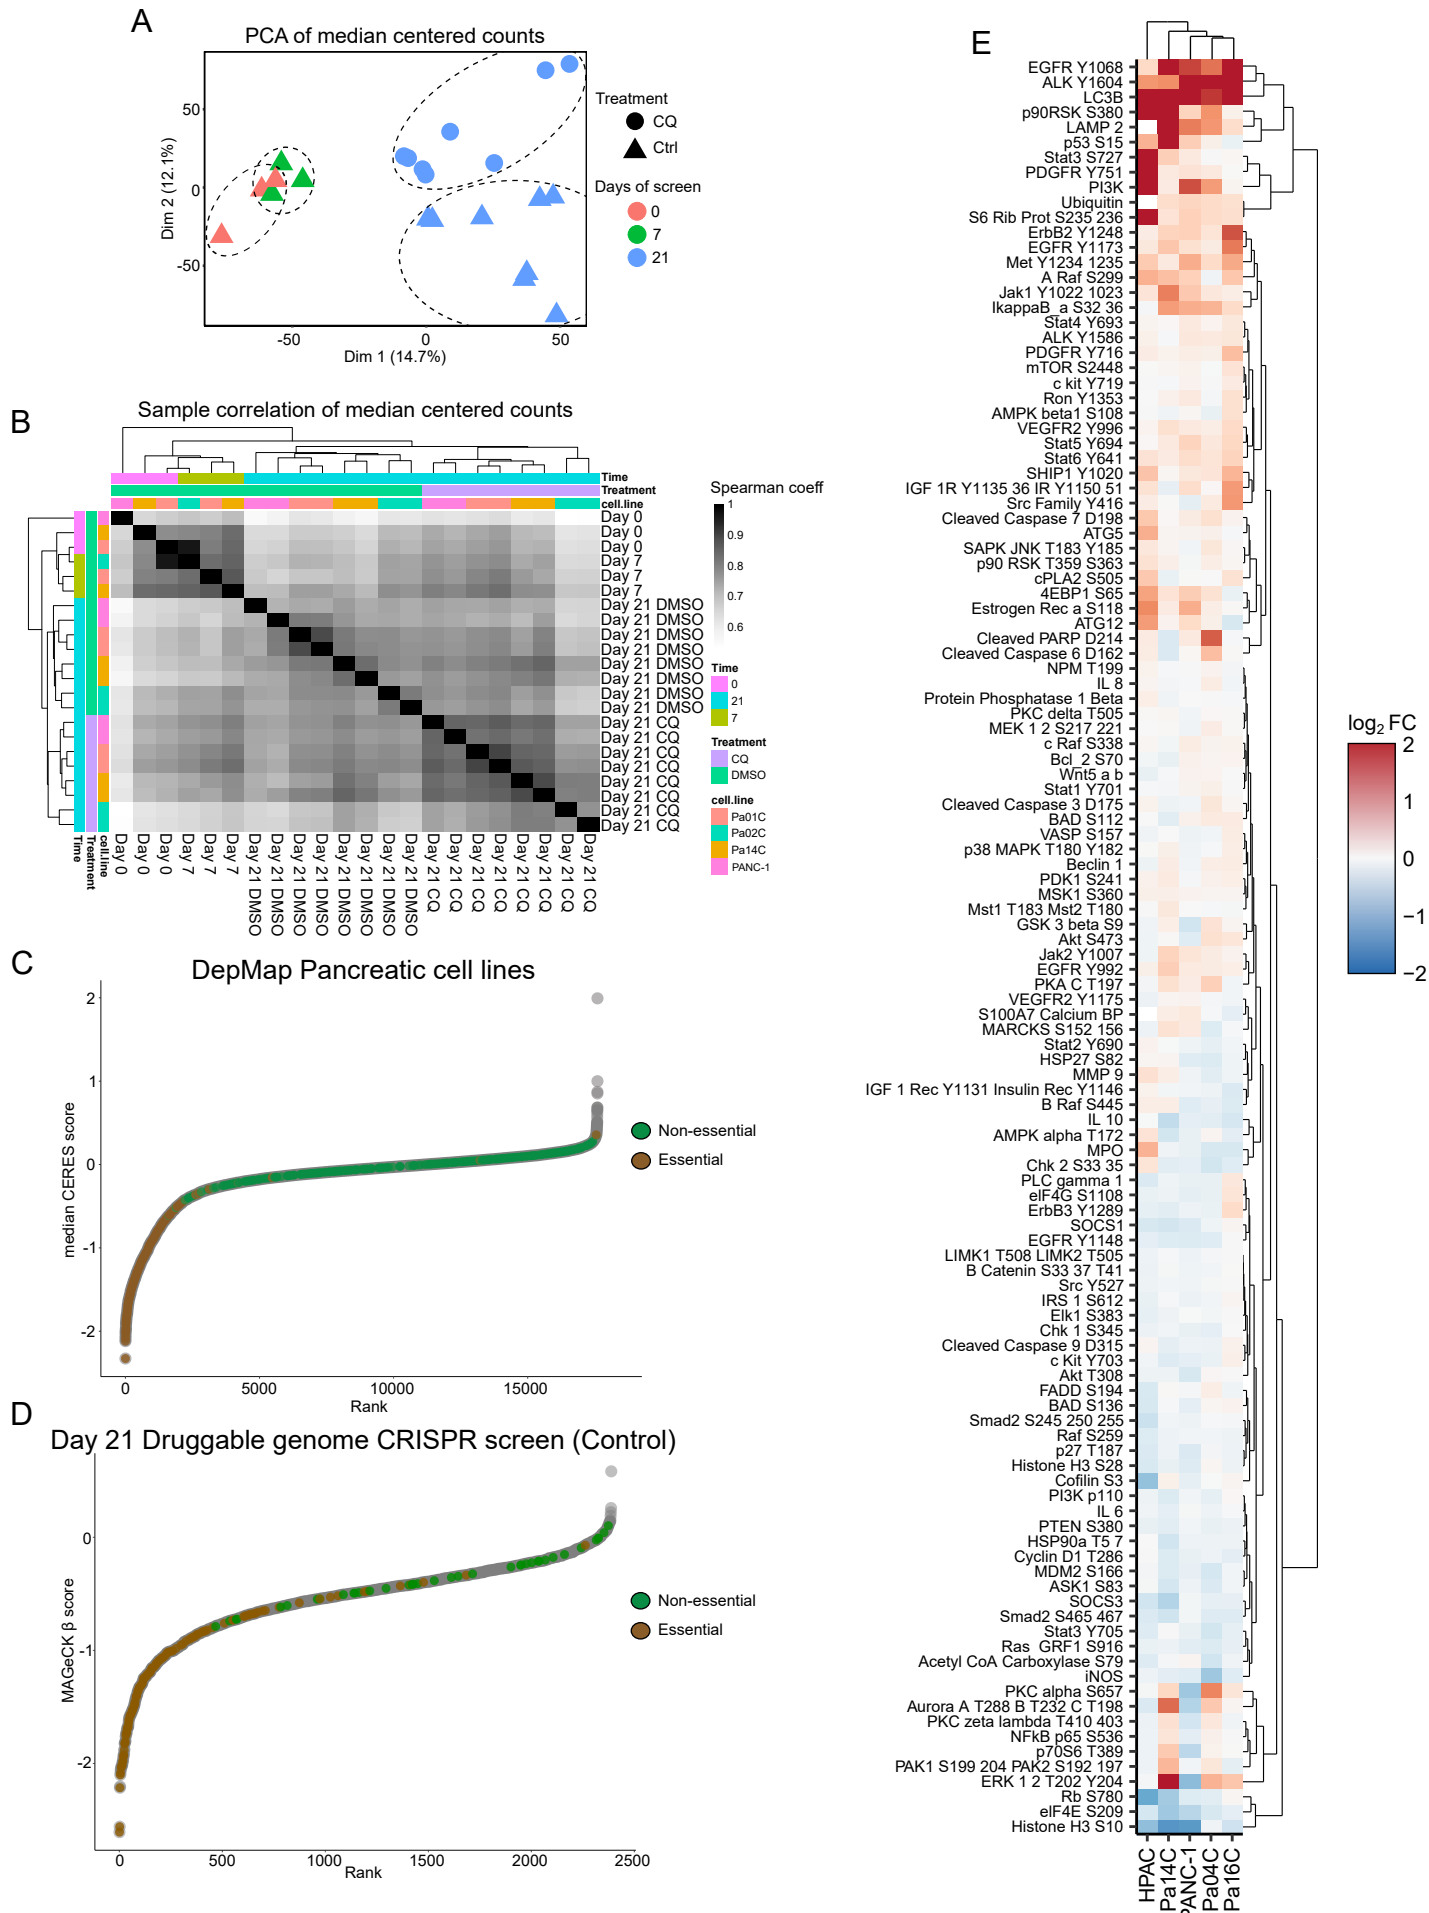

**F**

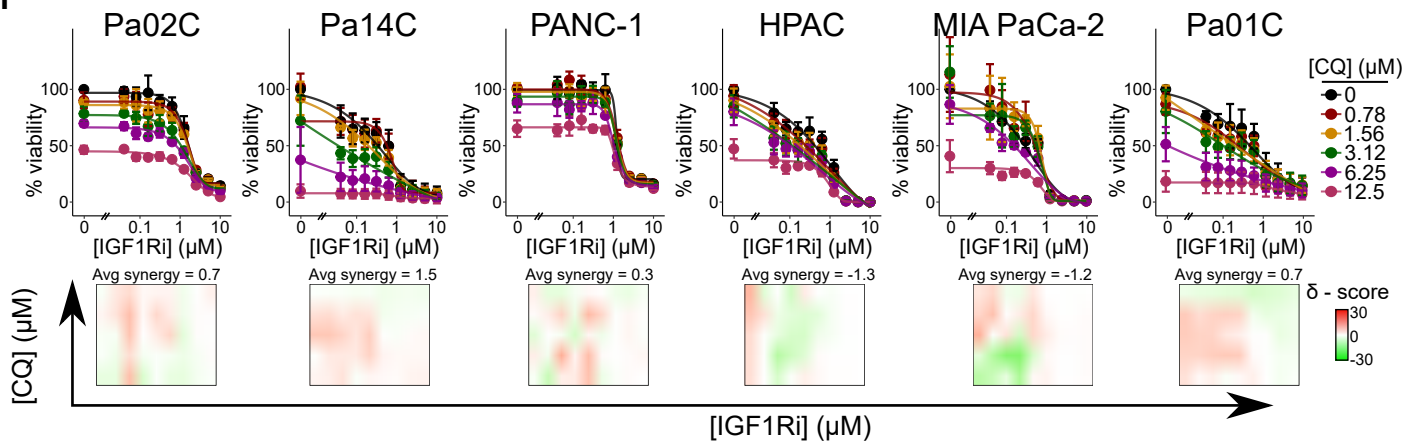

**G**

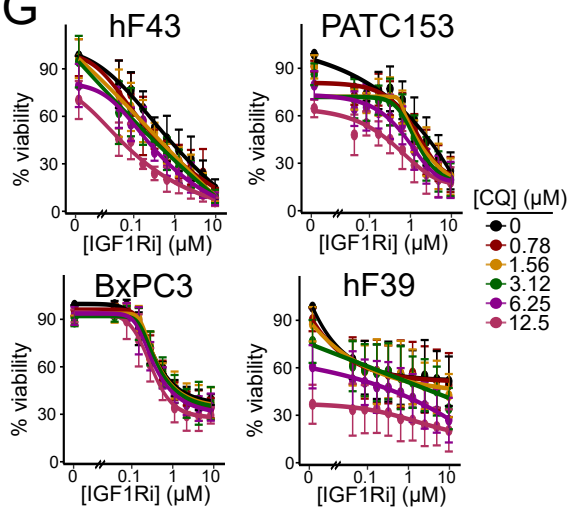

**H**

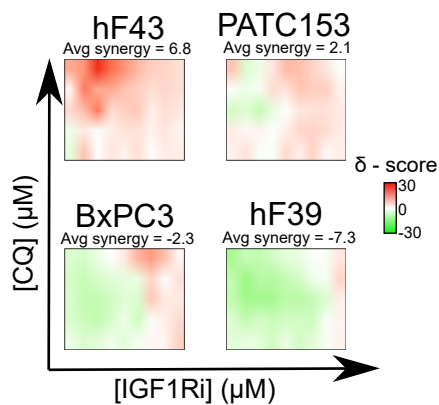

**I**

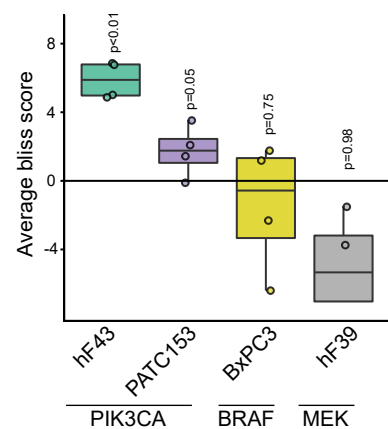

Supplement: NIHMS1767243-supplement-Supp_Fig_1.pdf [file NIHMS1767243-supplement-Supp_Fig_1.pdf]

Figure S2

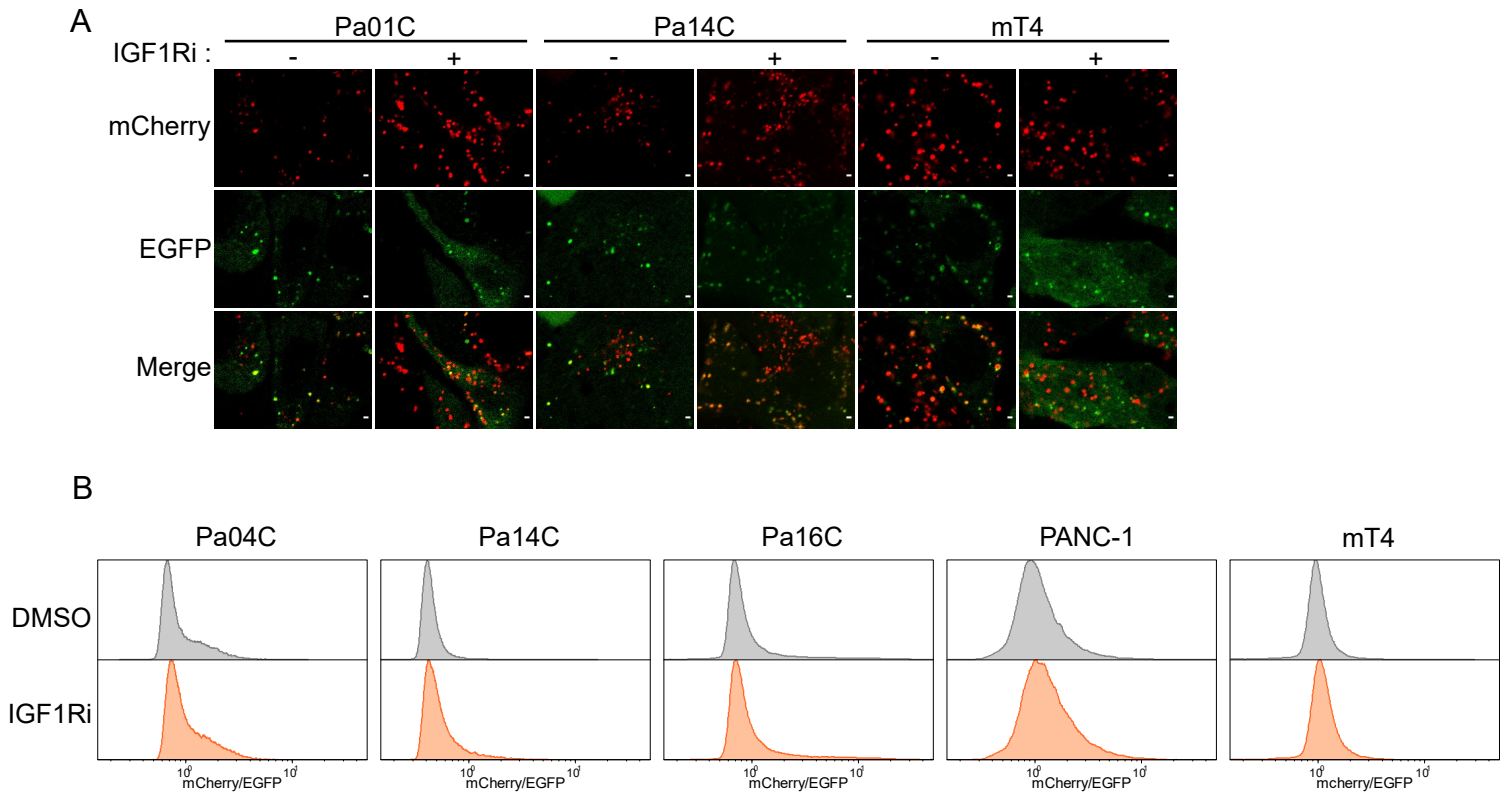

Supplement: NIHMS1767243-supplement-Supp_Fig_2.pdf [file NIHMS1767243-supplement-Supp_Fig_2.pdf]

Figure S3

A

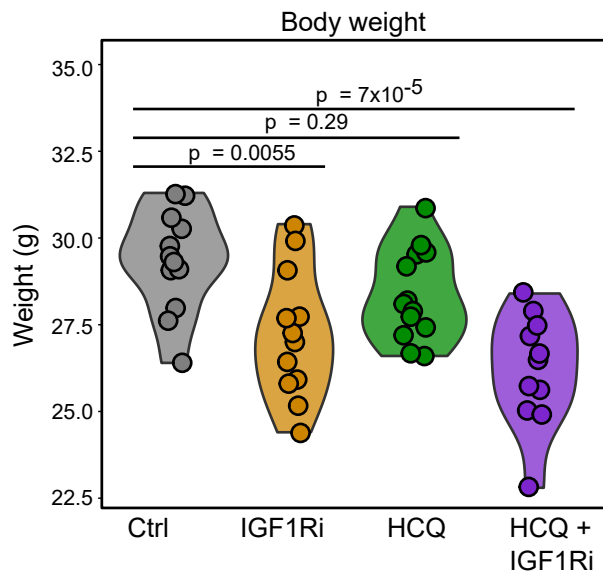

B

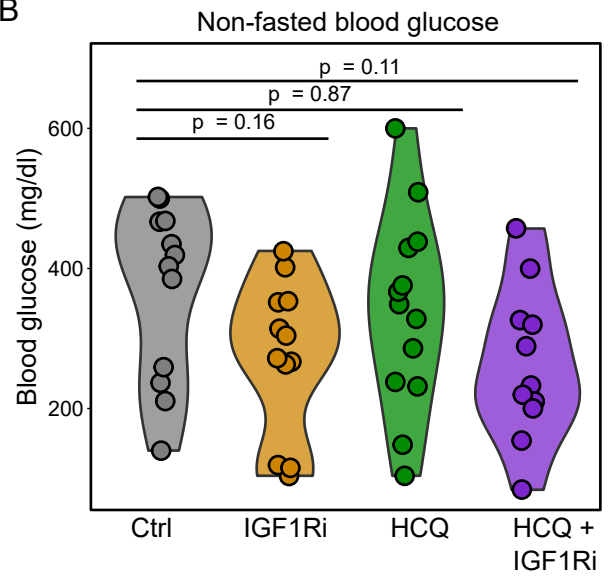

Supplement: NIHMS1767243-supplement-Supp_Fig_3.pdf [file NIHMS1767243-supplement-Supp_Fig_3.pdf]

Figure S4

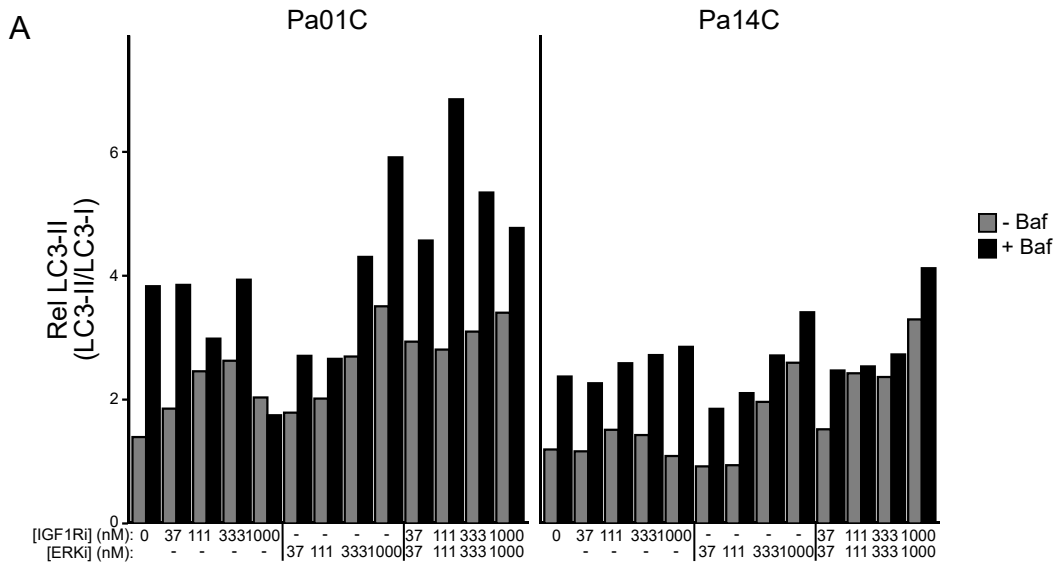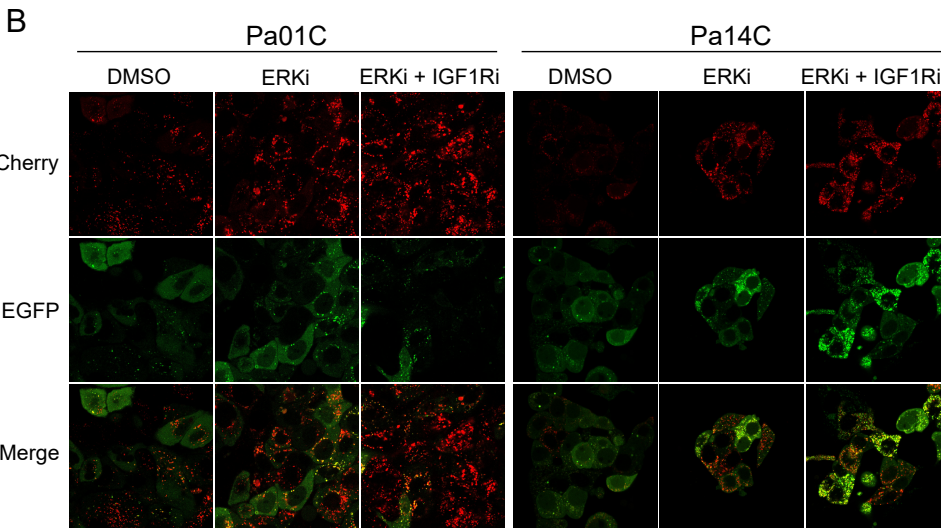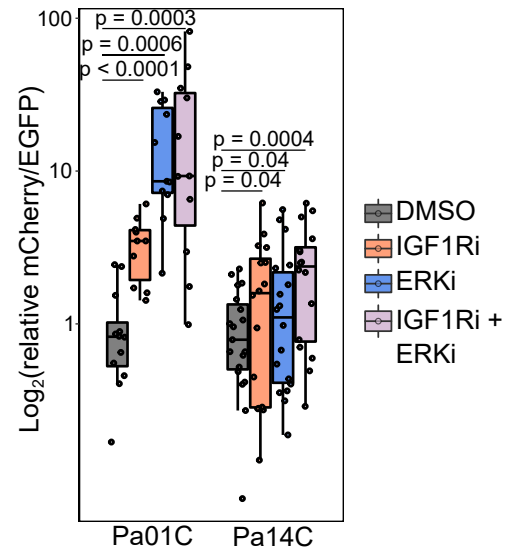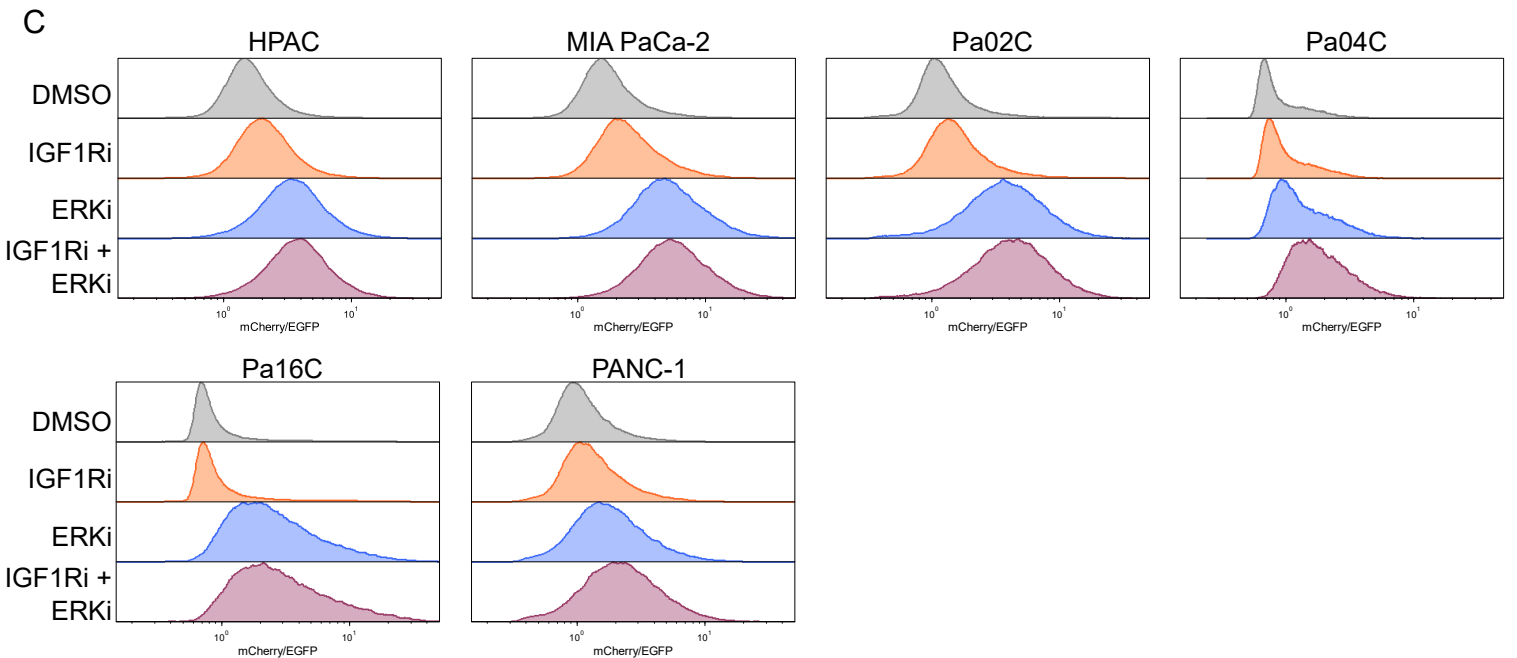

Supplement: NIHMS1767243-supplement-Supp_Fig_4.pdf [file NIHMS1767243-supplement-Supp_Fig_4.pdf]

Figure S5

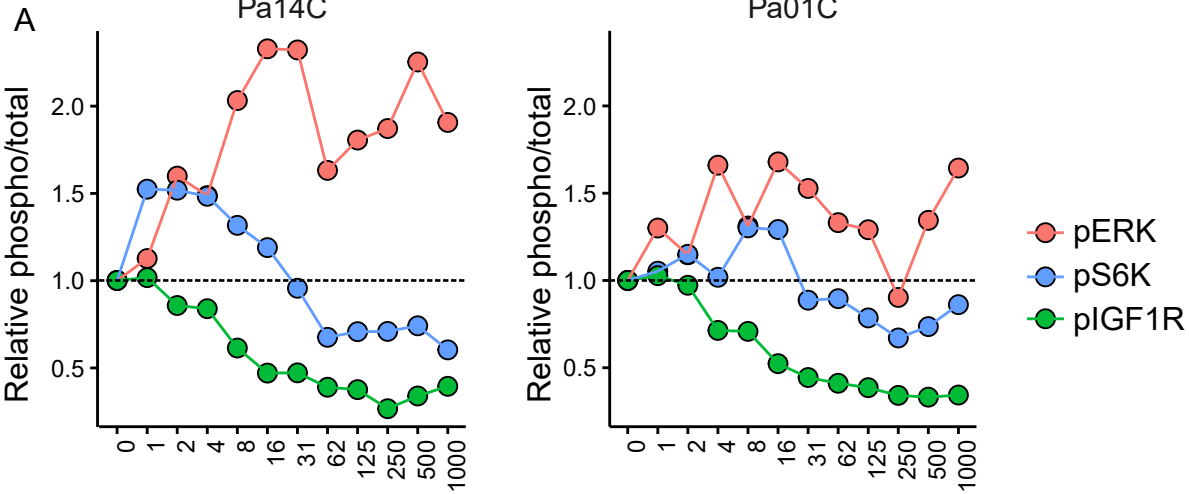

**B** IGF1Ri (BMS-754807) titration +/- sub-EC<sub>50</sub> dose of RAFi/MEKi/ERKi/PI3Ki/AKTi/mTORi

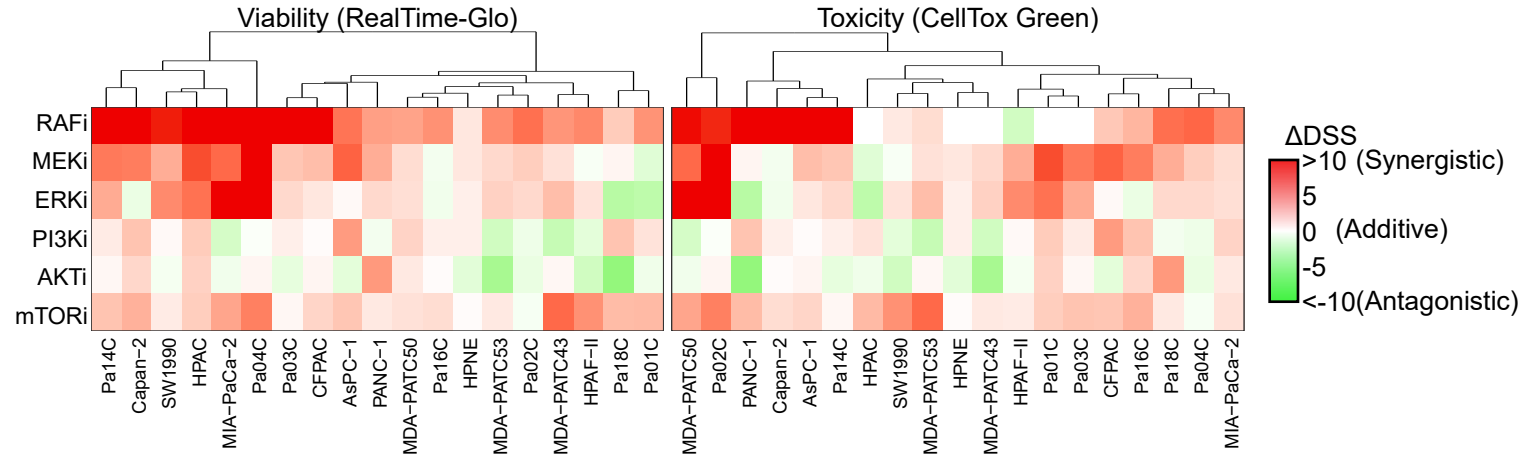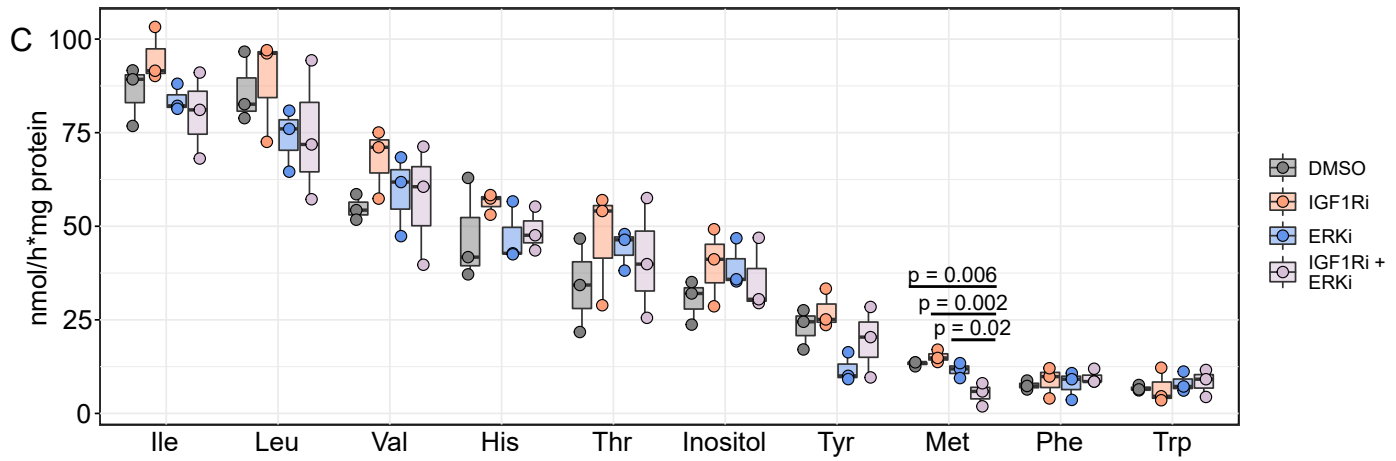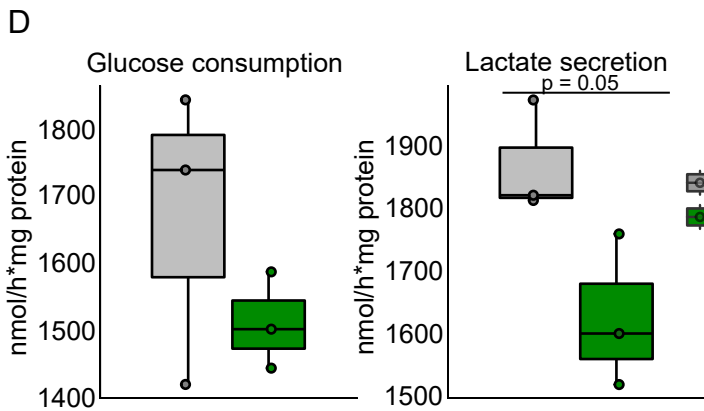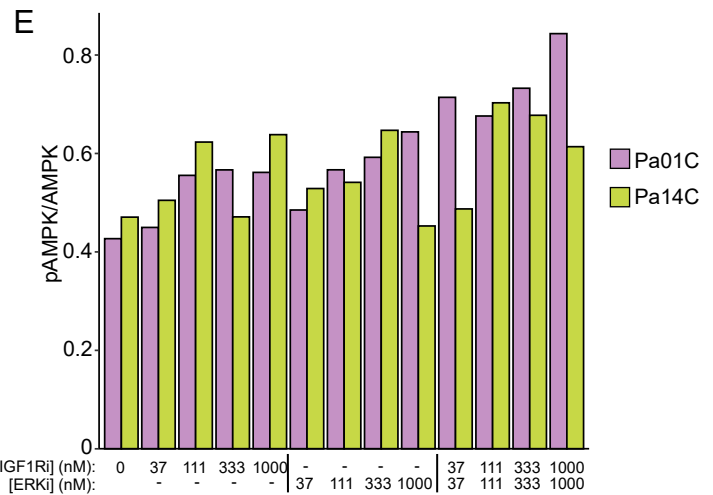

Supplement: NIHMS1767243-supplement-Supp_Fig_5.pdf [file NIHMS1767243-supplement-Supp_Fig_5.pdf]
